# Supplementary material for: The phage gene wmk is a candidate for male killing by a bacterial endosymbiont
Source: PLoS Pathog. 2019 Sep 10;15(9):e1007936. doi: 10.1371/journal.ppat.1007936 (PMC6736233; doi:10.1371/journal.ppat.1007936)
Supplement: S3 Table — All primers, names, and sequences are listed, along with the Y-chromosome FISH probe sequence that also has a 5’ Cy5 tag. (XLSX) [file ppat.1007936.s012.xlsx]

## Sheet: Sheet1
Gene	Primer Name	Primer Sequence
WD0626 (wmk) native	WD0626_F	AATTGGCCTCTCTGCTAATGAGTG
	WD0626_R	CACGTCCTTGCTCATAGTTGCTTA
WD0626 (wmk) transgene	WD0626opt_F	TCCAGTGAGCTCCGAGAAGA
	WD0626opt_R	CCACGCGGGTAAACTTTGTC
WD0034 (control) native	WD0034_F	GGAAGAAACTTGCACACCACTTAC
	WD0034_R	TGCTCTCCGACCATCTGGATATTT
WD0034 (control) transgene	WD0034opt_F	TTAAGTACCCAGACGGACGC
	WD0034opt_R	TCCTTGTTGTCGGGATAGCG
WD0625 transgene	WD0625opt_F	CGCGAGATGGATGACCTGAA
	WD0625opt_R	CTCGCGCTCACTATGTCCAA
WD0508 transgene	WD0508opt_F	GACGTGCTGATCAAGAGCCT
	WD0508opt_R	TGCCCACTGTCTTCAGGATG
Wolbachia groEL standard	groELstd_F	GGTGAGCAGTTGCAAGAAGC
	groELstd_R	AGATCTTCCATCTTGATTCC
Wolbachia groEL	groEL_F	CTAAAGTGCTTAATGCTTCACCTTC
	groEL_R	CAACCTTTACTTCCTATTCTTG
WD0631 (cifA) native	WD0631_F	TGTGGTAGGGAAGGAAAGAGGAAA
	WD0631_R	ATTCCAAGGACCATCACCTACAGA
Rpl36 (Drosophila)	Rpl36_F	GTTTAATTCTCAAGTAACGTCATC
	Rpl36_R	TGTCCAACATCCTCACC
5'Cy5 FISH probe Y chromosome (Cheng et al 2016)	5'Cy5YChrome	AATACAATACAATACAATACAATACAATAC
Wolbachia 16S	Wolb_F	GAAGATAATGACGGTACTCAC
	Wolb_R3	GTCACTGATCCCACTTTAAATAAC
wBif wmk homolog	wmk_wBif_F	AGGTTCGTGATACGGTGTGT
	wmk_wBif_R	ATCTGTGTACGCCCTCTTGC
wBif groEL	wBif_groEL_F	CGGGTTATAAGATTGCAGAAGGTG
	wBif_groEL_R	GAGATGCCACATCCAGCAATATTC
wBif cifA homolog	wBif_CifA_F	GAGATGGCTTGTAGTTACTGTGTG
	wBif_CifA_R	GACCTTTCCTTCGAATGCCACC
