# Supplementary material for: The phage gene wmk is a candidate for male killing by a bacterial endosymbiont
Source: PLoS Pathog. 2019 Sep 10;15(9):e1007936. doi: 10.1371/journal.ppat.1007936 (PMC6736233; doi:10.1371/journal.ppat.1007936)
Supplement: S6 Table — Strains include all those that are currently sequenced. (XLSX) [file ppat.1007936.s015.xlsx]

## Sheet: Sheet1
Homolog	% aa similarity to wMel Wmk
wRec Wmk	0.997
wBol1b Wmk	0.859
wCaub Wmk	0.833
wInn/wBor Wmk	0.779
wBif Wmk	0.262
